# Supplementary material
Source: PubMed Central journal article supplement (PMC8383802)
Supplement: NIHMS1733707-supplement-Supporting_Information__S2-S5.pdf [file NIHMS1733707-supplement-Supporting_Information__S2-S5.pdf]

## Supporting Information

### **KVA-D-88, a novel preferable phosphodiesterase 4B inhibitor, decreases cocaine-mediated reward properties *in vivo***

Maria E. Burkovetskaya<sup>1</sup>, Qiaoling Liu<sup>1</sup>, Anish K. Vadukoot<sup>2</sup>, Nagsen Gautam<sup>2</sup>, Yazen Alnouti<sup>2</sup>, Sushil Kumar<sup>2</sup>, Klaus Miczek<sup>3</sup>, Shilpa Buch<sup>1</sup>, Corey R. Hopkins<sup>2\*</sup>, Minglei Guo<sup>1, 4\*</sup>

1: Department of Pharmacology and Experimental Neuroscience, College of Medicine, University of Nebraska Medical Center, Omaha, NE 68198, USA

2: Department of Pharmaceutical Science, College of Pharmacy, University of Nebraska Medical Center, Omaha, NE 68198, USA

3: Department of Psychology, Tufts University, Medford, 530 Boston Ave, 02155, MA, USA.

4: Department of Pathology and anatomy, Eastern Virginia Medical School, Norfolk, VA 23507, USA

| <b>Table of Contents:</b> | <b>Page No:</b> |
|---------------------------|-----------------|
| Supplementary table       | S2              |
| Supplementary Fig. 1      | S3              |
| Supplementary Fig. 2      | S4              |
| Supplementary Fig. 3      | S5              |

| <b>PDE</b> | <b>% Inhibition</b> | <b>PDE</b> | <b>% Inhibition</b> |
|------------|---------------------|------------|---------------------|
| PDE1A1     | 23                  | PDE4D2     | 94                  |
| PDE1B      | 18                  | PDE4D3     | 79                  |
| PDE1C      | 15                  | PDE4D7     | 81                  |
| PDE2A1     | 4                   | PDE5A1     | 13                  |
| PDE3A      | 7                   | PDE6C      | 3                   |
| PDE3B      | 7                   | PDE7A1     | 1                   |
| PDE4A1A    | 87                  | PDE7B      | 1                   |
| PDE4A4B    | 88                  | PDE8A1     | 10                  |
| PDE4A10    | 91                  | PDE9A2     | 2                   |
| PDE4B1     | 81                  | PDE10A1    | 23                  |
| PDE4B2     | 93                  | PDE10A2    | 29                  |
| PDE4B3     | 91                  | PDE11A4    | 15                  |
| PDE4C1     | 54                  |            |                     |

**Supplementary table 1: The inhibitory effects of KVA-D-88 on PDE4 isoforms.** The IC50 values of KVA-D-88 on PDE4 isoforms were determined by BPS Bioscience, San Diego.

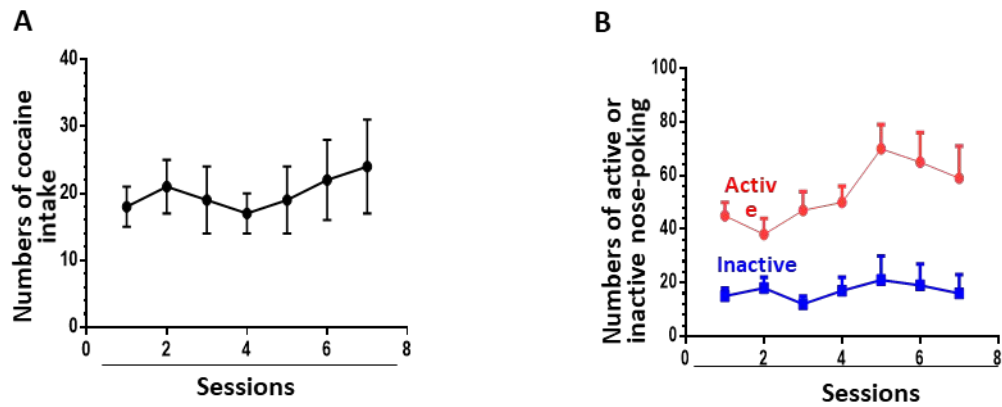

**Supplementary Fig. 1: The establishment of cocaine self-administered mice.** WT mice (both genders, 3-month old) were trained to develop stable cocaine self-administration on FR1 schedule. Then mice were pre-injected with KVA-D-88 at different doses and 30 min later put into self-administration box to record the numbers of cocaine self-intake and active nose-poking. Mice with vehicle injection served as controls. **(A)** The numbers of cocaine infusions in cocaine self-administered mice at basal levels. **(B)** The numbers of active nose-poking in cocaine self-administered mice at basal levels.

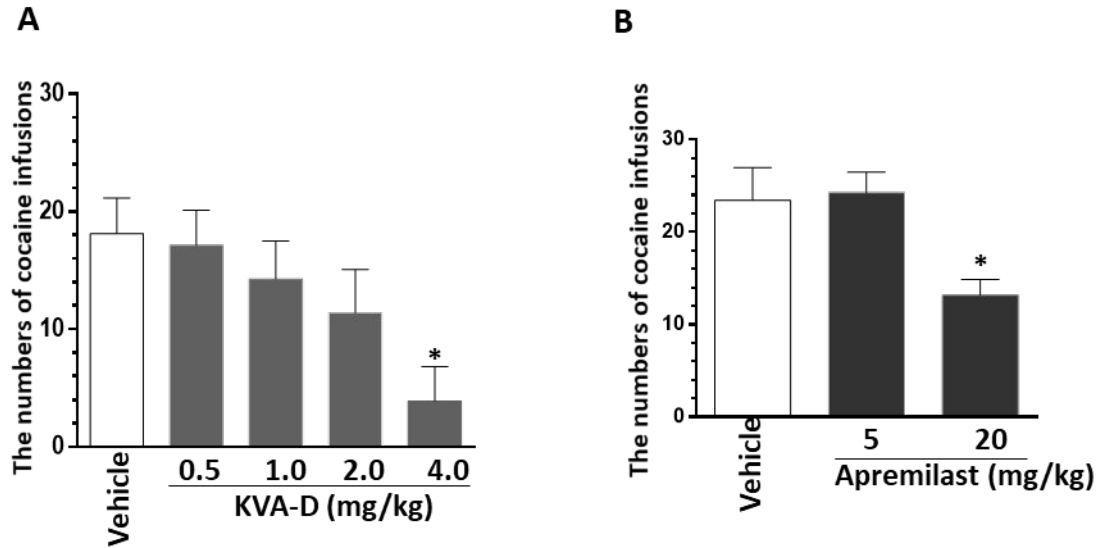

**Supplementary Fig. 2: The dose-curve effects of PDE4 inhibitors on cocaine self-intake.** WT mice (3-month old) were trained to develop stable cocaine self-administration on FR1 schedule. Then mice were pre-injected with KVA-D-88 or apremilast at varying doses and 30 min later put into self-administration box to record the numbers of cocaine self-intake and active nose-poking. **(A)** KVA-D-88 dose-dependently decreases cocaine intake. KVA-D-88 was administered into mice with increasing dose: 0.5, 1.0, 2.0, and 4.0 mg/kg for consecutive two sessions and the numbers of active nose poke were calculated as the average for each mouse (n = 4). **(B)** Apremilast decreased the number of cocaine infusions at the dose of 20 mg/kg but not at 5 mg/kg. Apremilast was administered into mice with increasing dose: 5 and 20 mg/kg for consecutive two sessions and the numbers of active nose poke were calculated as the average for each mouse (n = 4).

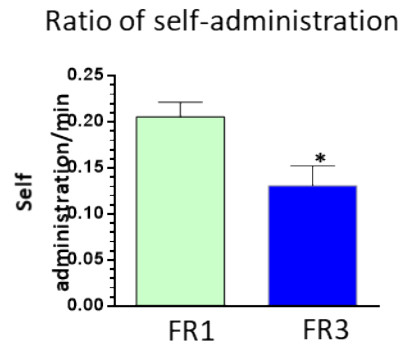

**Supplementary Fig. 3:** The effects of different schedule on the ratio of cocaine self-administration *in vivo*. The ratio of cocaine self-administration in mice under FR3 was significantly less than that of mice under FR1 ( $P < 0.05$ ).
